# Supplementary material for: Different roles of D1/D2 medium spiny neurons in the nucleus accumbens in pair bond formation of male mandarin voles
Source: eLife. 2025 Jun 6;13:RP100292. doi: 10.7554/eLife.100292 (PMC12143883; doi:10.7554/eLife.100292)
Supplement: Figure 1—figure supplement 1—source data 1. [file elife-100292-fig1-figsupp1-data1.xlsx]

## Sheet: Sheet1
Figure1 S1B	indicator Group	Time (s)
	partner (n = 9)	4141.95	2848.71	1894.12	1199.97	4866.89	3034.01	4788.4	7906.17	2437.48
	stranger (n = 9)	741.68	1821.62	1128.2	5245.49	829.86	3148.81	721.77	226.88	2723.55
Figure1 S1C	indicator Group	Time (s)
	partner (n = 9)	3474.59	7273.74	2823.38	5118.28	3927.96	5224.32	8705.68	6413.59	6768.22
	stranger (n = 9)	772.71	817.35	2085.96	1411.23	2698.25	313.08	542.64	454.56	1365.08
Figure1 S1	test type		Exact P-value, F-value with degree of freedom for ANOVAs, t-value with degree of freedom for t-tests
B	Paired t test		t (8) = 0.623, p = 0.551
C	Paired t test		t (8) = 5.294, p = 0.0007
