# Supplementary material for: Different roles of D1/D2 medium spiny neurons in the nucleus accumbens in pair bond formation of male mandarin voles
Source: eLife. 2025 Jun 6;13:RP100292. doi: 10.7554/eLife.100292 (PMC12143883; doi:10.7554/eLife.100292)
Supplement: Figure 1—figure supplement 2—source data 1. [file elife-100292-fig1-figsupp2-data1.xlsx]

## Sheet: Sheet1
Figure1 S2E	indicator Group	Mean of ΔF/F%
	partner (n = 5)	-0.000709669	-0.0699488	-0.0175476	-0.0404477	-0.0233339
	stranger (n = 5)	-0.000588258	0.000360164	-0.00020004	0.0396037	-0.0142698
	object (n = 5)	-0.0178349	-0.0291328	0.00282957	0.00330915	-0.0207278
Figure1 S2G	indicator Group	Mean of ΔF/F%
	partner (n = 5)	-0.0799474	0.0578001	0.0338137	-0.0596687	-0.152196
	stranger (n = 5)	-0.184563	-0.0551096	0.0355355	0.0418208	-0.213085
	object (n = 5)	-0.0130825	-0.0689254	-0.00330741	-0.0214123	-0.0107186
Figure1 S2I	indicator Group	Mean of ΔF/F%
	cagemate (n = 5)	0.0620197	0.0169328	-0.234679	-0.00979897	-0.015971
	stranger (n = 5)	-0.00068843	-0.00755554	-0.0602316	-0.034821	-0.0231646
	object (n = 5)	-0.0471567	0.00716484	0.0569423	-0.0784443	-0.0247743
Figure1 S2K	indicator Group	Mean of ΔF/F%
	cagemate (n = 5)	-0.0105902	-0.0103587	-0.136326	0.0390807	-0.0172007
	stranger (n = 5)	-0.0640523	-0.0426037	-0.0651129	0.00173177	0.16357
	object (n = 5)	0.0332112	-0.0198835	0.109112	-0.0836727	-0.144538
Figure1 S2	test type		Exact P-value, F-value with degree of freedom for ANOVAs, t-value with degree of freedom for t-tests
E	One-Way Repeated Measures ANOVA		F (2.000, 8.00) = 4.092, p = 0.0597
G	One-Way Repeated Measures ANOVA		F (2.000, 8.00) = 0.6107, p = 0.5665
I	One-Way Repeated Measures ANOVA		F (2.000, 8.00) = 0.0800, p = 0.9238
K	One-Way Repeated Measures ANOVA		F (2.000, 8.00) = 2.786, p = 0.1207
