# Supplementary material for: Different roles of D1/D2 medium spiny neurons in the nucleus accumbens in pair bond formation of male mandarin voles
Source: eLife. 2025 Jun 6;13:RP100292. doi: 10.7554/eLife.100292 (PMC12143883; doi:10.7554/eLife.100292)
Supplement: Figure 1—figure supplement 3—source data 1. [file elife-100292-fig1-figsupp3-data1.xlsx]

## Sheet: Sheet1
Figure1 S3F	indicator Group	Mean of ΔF/F%
	partner (n = 7)	1.0428	0.991505	0.809148	0.373311	0.241479	0.54808	0.933133
	stranger (n = 7)	0.793359	0.430451	0.682725	0.896151	0.407387	0.448662	0.908381
	object (n = 7)	0.136463	0.084421	-0.52784	0.10575	-0.03423	-0.23912	-0.52281
Figure1 S3I	indicator Group	Mean of ΔF/F%
	partner (n = 7)	1.39712	0.58709	0.750763	0.133147	0.180688	0.416611	0.67705
	stranger (n = 7)	1.20386	0.996335	0.36897	0.279145	0.399973	0.350425	0.703749
	object (n = 7)	0.071195	0.28734	-0.91741	0.035394	-0.11796	0.113286	-0.00061
Figure1 S3	test type		Exact P-value, F-value with degree of freedom for ANOVAs, t-value with degree of freedom for t-tests
F	One-Way Repeated Measures ANOVA		F (2.000, 12.00) = 19.59, p = 0.0002; partner vs. object, p = 0.0004, stranger vs. object, p = 0.0006
I	One-Way Repeated Measures ANOVA		F (2.000, 12.00) = 10.85, p = 0.0087; partner vs. object, p = 0.0056, stranger vs. object, p = 0.0044
J	Two-Way Repeated Measures ANOVA		group × treatment: F (2, 12) = 0.5558, p = 0.5877; group: F (2, 12) = 20.53, p = 0.0001; treatment: F (1, 6) = 0.1467, p = 0.7149
