# Supplementary material for: Different roles of D1/D2 medium spiny neurons in the nucleus accumbens in pair bond formation of male mandarin voles
Source: eLife. 2025 Jun 6;13:RP100292. doi: 10.7554/eLife.100292 (PMC12143883; doi:10.7554/eLife.100292)
Supplement: Figure 1—figure supplement 4—source data 1. [file elife-100292-fig1-figsupp4-data1.xlsx]

## Sheet: Sheet1
Figure1 S4F	indicator Group	Mean of ΔF/F%
	cagemate (n = 6)	0.892549	-0.02901	-0.04327	0.402922	0.004163	0.097861
	stranger (n = 6)	0.532575	0.2753	0.452407	0.133563	0.64374	-0.00812
	object (n = 6)	-0.1153	-0.55669	0.18063	-0.04589	0.03232	-0.26349
Figure1 S4I	indicator Group	Mean of ΔF/F%
	cagemate (n = 6)	0.828631	0.169369	-0.08105	0.032245	0.779968	0.175598
	stranger (n = 6)	0.853882	0.281967	0.059834	0.068812	0.583285	0.175788
	object (n = 6)	0.35465	-0.08767	-0.09789	-0.12436	-0.01134	-0.08518
Figure1 S4	test type		Exact P-value, F-value with degree of freedom for ANOVAs, t-value with degree of freedom for t-tests
F	One-Way Repeated Measures ANOVA		F (2.000, 10.00) = 4.864, p = 0.0335; stranger vs. object, p = 0.0396
I	One-Way Repeated Measures ANOVA		F (2.000, 10.00) = 11.42, p = 0.0026; cagemate vs. object, p = 0.0074; stranger vs. object, p = 0.0050
