# Supplementary material for: Different roles of D1/D2 medium spiny neurons in the nucleus accumbens in pair bond formation of male mandarin voles
Source: eLife. 2025 Jun 6;13:RP100292. doi: 10.7554/eLife.100292 (PMC12143883; doi:10.7554/eLife.100292)
Supplement: Figure 1—figure supplement 5—source data 1. [file elife-100292-fig1-figsupp5-data1.xlsx]

## Sheet: Sheet1
Figure1 S5A	indicator Group	partner
	baseline	-0.00052	0.000627	0.000244	0.001118	0.001108	0.000371	-5.4e-05
	sniffing	1.07059	0.471248	0.232803	0.369829	0.204687	0.170447	0.239152
	indicator Group	stranger
	baseline	0.00069	0.001843	0.000626	0.000756	-0.00092	0.000615	-0.00061
	sniffing	0.230345	0.585855	0.301507	0.279699	0.370429	0.043182	0.286326
	indicator Group	object
	baseline	0.001311	0.00083	0.001659	-3.4e-05	0.000603	-0.0008	-0.00044
	sniffing	-0.38508	0.06494	-0.06716	-0.0626	-0.02475	-0.15935	-0.02981
Figure1 S5B	indicator Group	partner
	baseline	0.005885	0.011444	-4.5e-05	0.002857	-0.00343	-0.002	0.001545
	sniffing	2.54595	2.90936	1.35671	1.0999	2.21822	1.21867	0.996091
	indicator Group	stranger
	baseline	0.001305	-0.00077	0.001137	0.002258	-0.01252	-9.9e-06	-0.00046
	sniffing	1.70031	1.65366	0.367273	0.295472	-0.377	0.853278	0.64846
	indicator Group	object
	baseline	-0.00046	0.000488	0.000299	-0.00058	5.39e-06	-0.00023	0.00091
	sniffing	-0.06699	0.014597	-0.01365	-0.21498	-0.02008	-0.03414	-0.14913
Figure1 S5	test type		Exact P-value, F-value with degree of freedom for ANOVAs, t-value with degree of freedom for t-tests
A	partner: Paired t test		t (6) = 3.290, p = 0.0166
	stranger: Paired t test		t (6) = 4.884, p = 0.0028
	object: Paired t test		t (6) = 1.745, p = 0.1315
B	partner: Paired t test		t (6) = 6.020, p = 0.0009
	stranger: Paired t test		t (6) = 2.611, p = 0.0401
	object: Paired t test		t (6) = 2.209, p = 0.0692
