# Supplementary material for: Different roles of D1/D2 medium spiny neurons in the nucleus accumbens in pair bond formation of male mandarin voles
Source: eLife. 2025 Jun 6;13:RP100292. doi: 10.7554/eLife.100292 (PMC12143883; doi:10.7554/eLife.100292)
Supplement: Figure 1—figure supplement 6—source data 1. [file elife-100292-fig1-figsupp6-data1.xlsx]

## Sheet: Sheet1
Figure1 S6A	indicator Group	cagemate
	baseline	-0.00143	0.001293	-0.00037	0.002282	0.000516	-0.00023
	sniffing	0.892549	-0.02901	-0.04327	0.402922	0.004163	0.097861
	indicator Group	stranger
	baseline	0.002417	-0.00052	0.000122	0.000525	-0.00157	-0.00026
	sniffing	0.532575	0.2753	0.452407	0.133563	0.64374	-0.00812
	indicator Group	object
	baseline	0.000491	0.003208	0.011056	-0.00156	0.000167	-0.00038
	sniffing	-0.1153	-0.55669	0.18063	-0.04589	0.03232	-0.26349
Figure1 S6B	indicator Group	cagemate
	baseline	-1.2e-05	-0.0012	0.000373	-0.00034	0.001777	0.00091
	sniffing	0.828631	0.169369	-0.08105	0.032245	0.779968	0.175598
	indicator Group	stranger
	baseline	0.000424	0.000179	-0.00163	0.000121	-0.00111	1.81e-05
	sniffing	0.853882	0.281967	0.059834	0.068812	0.583285	0.175788
	indicator Group	object
	baseline	-0.00016	0.000502	0.001447	0.002333	0.000194	-8e-05
	sniffing	0.35465	-0.08767	-0.09789	-0.12436	-0.01134	-0.08518
Figure1 S6	test type		Exact P-value, F-value with degree of freedom for ANOVAs, t-value with degree of freedom for t-tests
A	cagemater: Paired t test		t (5) = 1.464, p = 0.2030
	stranger: Paired t test		t (5) = 3.327, p = 0.0209
	object: Paired t test		t (5) = 1.249, p = 0.2669
B	cagemater: Paired t test		t (5) = 1.998, p = 0.1021
	stranger: Paired t test		t (5) = 2.602, p = 0.0481
	object: Paired t test		t (5) = 0.1254, p = 0.9051
