# Supplementary material for: Different roles of D1/D2 medium spiny neurons in the nucleus accumbens in pair bond formation of male mandarin voles
Source: eLife. 2025 Jun 6;13:RP100292. doi: 10.7554/eLife.100292 (PMC12143883; doi:10.7554/eLife.100292)
Supplement: Figure 1—figure supplement 7—source data 1. [file elife-100292-fig1-figsupp7-data1.xlsx]

## Sheet: Sheet1
Figure1 S7D	indicator Group	Mean of ΔF/F%
	3-baseline (n = 8)	0.009445	0.000756	0.001047	-0.00179	-0.00207	-0.00341	0.093896	-0.14135
	7-baseline (n = 8)	0.00057	-0.00073	0.003818	6.34e-05	6.37e-14	-0.0004	-3.5e-14	-5e-14
	3-carrot (n = 8)	1.75465	0.014012	1.97174	0.963243	1.63223	1.38717	1.35933	1.75121
	7-carrot (n = 8)	1.46726	0.168211	3.05839	1.13192	0.723729	1.38664	1.87639	1.36277
Figure1 S7	test type		Exact P-value, F-value with degree of freedom for ANOVAs, t-value with degree of freedom for t-tests
D	Two-Way Repeated Measures ANOVA		group × treatment: F (1, 7) = 0.0274, p = 0.8732; group: F (1, 7) = 0.0557, p = 0.8201; treatment: F (1, 7) = 32.79, p = 0.0007
