# Supplementary material for: Different roles of D1/D2 medium spiny neurons in the nucleus accumbens in pair bond formation of male mandarin voles
Source: eLife. 2025 Jun 6;13:RP100292. doi: 10.7554/eLife.100292 (PMC12143883; doi:10.7554/eLife.100292)
Supplement: Figure 1—figure supplement 8—source data 1. [file elife-100292-fig1-figsupp8-data1.xlsx]

## Sheet: Sheet1
Figure1 S8A-B	indicator Group	Mean of ΔF/F%
	3-partner	0.062722	-0.01936	-0.2935	0.01806	-0.27919
	3-stranger	0.086572	0.035043	-0.46786
	7-partner	0.065463	-0.05792	0.194498	0.050191	0.18954	0.519244	0.325799
	7-stranger	-0.07863	-0.16142	-0.14286	0.000898
Figure1 S8	test type		Exact P-value, F-value with degree of freedom for ANOVAs, t-value with degree of freedom for t-tests
A	Two-tailed unpaired t-test		t (6) = 0.08005, p = 0.9388
B	Two-tailed unpaired t-test		t (9) = 2.733, p = 0.0231
