# Supplementary material for: Different roles of D1/D2 medium spiny neurons in the nucleus accumbens in pair bond formation of male mandarin voles
Source: eLife. 2025 Jun 6;13:RP100292. doi: 10.7554/eLife.100292 (PMC12143883; doi:10.7554/eLife.100292)
Supplement: Figure 1—figure supplement 9—source data 1. [file elife-100292-fig1-figsupp9-data1.xlsx]

## Sheet: Sheet1
Figure1 S9A	indicator Group	Mean of ΔF/F%
	3-freezing (n = 7)	0.070825	-0.56441	0.251311	0.12362	0.051404	-0.0518	-0.11949
	3-exploring (n = 7)	-0.13835	-1.77892	-0.16635	-0.23866	0.008855	0.049972	0.063265
	3-groomnig (n = 7)	-0.51032	0.573746	0.00116	-0.57467	0.171023	-0.22807	-0.27915
	3-rearing (n = 7)	-0.55721	-0.64377	-0.29288	-0.0157	0.294477	-0.0119	0.115426
	7-freezing (n = 7)	-0.02969	0.46458	-0.02983	-0.01167	-0.23603	0.181418	0.04999
	7-exploring (n = 7)	-0.03786	-0.13691	-0.19233	0.059512	0.124847	-0.26351	0.169732
	7-groomnig (n = 7)	-0.10348	-0.0668	-0.0916	0.002393	0.322454	-0.31274	-0.1178
	7-rearing (n = 7)	0.182891	-0.13691	0.027087	0.132162	0.050708	-0.04023	0.044317
Figure1 S9B	indicator Group	Mean of ΔF/F%
	3 day
	partner (n = 7)	1.07059	0.471248	0.232803	0.369829	0.204687	0.170447	0.239152
	stranger (n = 7)	0.230345	0.585855	0.301507	0.279699	0.370429	0.043182	0.286326
	object (n = 7)	-0.38508	0.06494	-0.06716	-0.0626	-0.02475	-0.15935	-0.02981
	7 day
	partner (n = 7)	2.54595	2.90936	1.35671	1.0999	2.21822	1.21867	0.996091
	stranger (n = 7)	1.70031	1.65366	0.367273	0.295472	-0.377	0.853278	0.64846
	object (n = 7)	-0.06699	0.014597	-0.01365	-0.21498	-0.02008	-0.03414	-0.14913
Figure1 S9C	indicator Group	Mean of ΔF/F%
	3 day
	cagemate (n = 6)	0.892549	-0.02901	-0.04327	0.402922	0.004163	0.097861
	stranger (n = 6)	0.532575	0.2753	0.452407	0.133563	0.64374	-0.00812
	object (n = 6)	-0.1153	-0.55669	0.18063	-0.04589	0.03232	-0.26349
	7 day
	cagemate (n = 6)	0.828631	0.169369	-0.08105	0.032245	0.779968	0.175598
	stranger (n = 6)	0.853882	0.281967	0.059834	0.068812	0.583285	0.175788
	object (n = 6)	0.35465	-0.08767	-0.09789	-0.12436	-0.01134	-0.08518
Figure1 S9	test type		Exact P-value, F-value with degree of freedom for ANOVAs, t-value with degree of freedom for t-tests
A	Two-Way Repeated Measures ANOVA		group × treatment: F (3, 18) = 0.3050, p = 0.8214; group: F (3, 18) = 0.7172, p = 0.5545; treatment: F (1, 6) = 2.757, p = 0.1479
B	Two-Way Repeated Measures ANOVA		group × treatment: F (2, 12) = 11.50, p = 0.0016; group: F (2, 12) = 25.43, p < 0.0001; treatment: F (1, 6) = 18.52, p = 0.0051
C	Two-Way Repeated Measures ANOVA		group × treatment: F (2, 10) = 0.3067, p = 0.7425; group: F (2, 10) = 10.83, p = 0.0031; treatment: F (1, 5) = 0.6553, p = 0.4550
