# Supplementary material for: Different roles of D1/D2 medium spiny neurons in the nucleus accumbens in pair bond formation of male mandarin voles
Source: eLife. 2025 Jun 6;13:RP100292. doi: 10.7554/eLife.100292 (PMC12143883; doi:10.7554/eLife.100292)
Supplement: Figure 1—source data 1. [file elife-100292-fig1-data1.xlsx]

## Sheet: Sheet1
Figure 1F	indicator Group	Mean of ΔF/F%
	partner (n = 7)	1.07059	0.471248	0.232803	0.369829	0.204687	0.170447	0.239152
	stranger (n = 7)	0.230345	0.585855	0.301507	0.279699	0.370429	0.043182	0.286326
	object (n = 7)	-0.38508	0.06494	-0.06716	-0.0626	-0.02475	-0.15935	-0.02981
Figure 1I	indicator Group	Mean of ΔF/F%
	partner (n = 7)	2.54595	2.90936	1.35671	1.0999	2.21822	1.21867	0.996091
	stranger (n = 7)	1.70031	1.65366	0.367273	0.295472	-0.377	0.853278	0.64846
	object (n = 7)	-0.06699	0.014597	-0.01365	-0.21498	-0.02008	-0.03414	-0.14913
Figure1	test type		Exact P-value, F-value with degree of freedom for ANOVAs, t-value with degree of freedom for t-tests
F	One-Way Repeated Measures ANOVA		F (2.000, 12.00) = 8.702, p = 0.0001; partner vs. object, p = 0.0060; stranger vs. object, p = 0.0239
I	One-Way Repeated Measures ANOVA		F (2.000, 12.00) = 21.41, p = 0.0002; partner vs. stranger, p = 0.0097; partner vs. object, p < 0.0001, stranger vs. object, p = 0.0422
