# Supplementary material for: Different roles of D1/D2 medium spiny neurons in the nucleus accumbens in pair bond formation of male mandarin voles
Source: eLife. 2025 Jun 6;13:RP100292. doi: 10.7554/eLife.100292 (PMC12143883; doi:10.7554/eLife.100292)
Supplement: Figure 2—figure supplement 1—source data 1. [file elife-100292-fig2-figsupp1-data1.xlsx]

## Sheet: Sheet1
Figure2 S1B	D2-EGFP (n = 6)	D2-EGFP+D2R-mRNA+/D2-EGFP+(%)						D2-EGFP+D2R-mRNA+/D2R-mRNA+(%)
		74.5098	84.9057	87.1795	79.5455	92.5926	84.7458	95	97.8261	94.4444	97.2222	83.3333	94.3396
Figure2 S1E	indicator Group	Mean of ΔF/F%
	partner (n = 5)	-0.0030271	0.0504569	-0.00136978	-0.0432792	-0.102211
	stranger (n = 5)	-0.0586498	0.0143432	0.00155559	-0.062823	-0.0271544
	object (n = 5)	-0.000499819	0.0134602	-0.0115818	-0.017468	0.00211869
Figure2 S1G	indicator Group	Mean of ΔF/F%
	partner (n = 5)	-0.0895482	0.000873864	-0.00999944	-0.0571588	-0.0857593
	stranger (n = 5)	-0.0602739	-0.0477276	0.199903	0.0098422	-0.0376166
	object (n = 5)	0.0132953	-0.016401	0.01031	0.00261446	0.00284767
Figure2 S1I	indicator Group	Mean of ΔF/F%
	cagemate (n = 5)	0.0896846	-0.019506	-0.020801	0.00130104	-0.107162
	stranger (n = 5)	-0.0497601	-0.044227	-0.0143856	-0.0249529	0.00612927
	object (n = 5)	-0.0686713	0.00332203	-0.140471	-0.0327533	-0.0417784
Figure2 S1K	indicator Group	Mean of ΔF/F%
	cagemate (n = 5)	-0.00716139	-0.0287159	0.0132703	-0.00127146	0.014875
	stranger (n = 5)	-0.0284846	-0.0136295	0.0114011	-0.043374	0.0197583
	object (n = 5)	-0.105738	-0.0719517	-0.0348616	-0.0209148	0.063199
Figure2 S1	test type		Exact P-value, F-value with degree of freedom for ANOVAs, t-value with degree of freedom for t-tests
E	One-Way Repeated Measures ANOVA		F (2.000, 8.00) = 0.7086, p = 0.5208
G	One-Way Repeated Measures ANOVA		F (2.000, 8.00) = 1.450, p = 0.2901
I	One-Way Repeated Measures ANOVA		F (2.000, 8.00) = 0.7471, p = 0.5041
K	One-Way Repeated Measures ANOVA		F (2.000, 8.00) = 1.344, p = 0.3140
