# Supplementary material for: Different roles of D1/D2 medium spiny neurons in the nucleus accumbens in pair bond formation of male mandarin voles
Source: eLife. 2025 Jun 6;13:RP100292. doi: 10.7554/eLife.100292 (PMC12143883; doi:10.7554/eLife.100292)
Supplement: Figure 2—figure supplement 2—source data 1. [file elife-100292-fig2-figsupp2-data1.xlsx]

## Sheet: Sheet1
Figure2 S2F	indicator Group	Mean of ΔF/F%
	cagemate (n = 6)	0.057949	-0.03087	-0.1972	-0.57589	-0.54939	-0.28546
	stranger (n = 6)	-0.3417	-0.28341	-0.0244	-0.56005	-0.73372	0.031685
	object (n = 6)	0.046313	-0.03685	0.015193	-0.01304	-0.05355	-0.00507
Figure2 S2I	indicator Group	Mean of ΔF/F%
	cagemate (n = 6)	-0.46707	-0.11963	-0.15683	-0.04307	-0.61151	-0.41636
	stranger (n = 6)	-0.23776	-0.04307	-0.19399	-0.26804	-0.94428	-0.50783
	object (n = 6)	-0.05055	0.022465	-0.08901	-0.06851	0.067325	-0.03527
Figure2 S2	test type		Exact P-value, F-value with degree of freedom for ANOVAs, t-value with degree of freedom for t-tests
F	One-Way Repeated Measures ANOVA		F (2.000, 10.00) = 4.664, p = 0.0371; stranger vs. object, p = 0.0498
I	One-Way Repeated Measures ANOVA		F (2.000, 10.00) = 4.940, p = 0.0322; stranger vs. object, p = 0.0426
