# Supplementary material for: Different roles of D1/D2 medium spiny neurons in the nucleus accumbens in pair bond formation of male mandarin voles
Source: eLife. 2025 Jun 6;13:RP100292. doi: 10.7554/eLife.100292 (PMC12143883; doi:10.7554/eLife.100292)
Supplement: Figure 2—figure supplement 3—source data 1. [file elife-100292-fig2-figsupp3-data1.xlsx]

## Sheet: Sheet1
Figure2 S3A	indicator Group	partner
	baseline	-0.00617	-0.00137	-0.00044	-0.00032	-0.00027	0.000258	-0.00042
	sniffing	-1.45448	-0.57317	-0.29963	-0.23852	-0.18145	-0.49005	-0.22863
	indicator Group	stranger
	baseline	0.00014	-0.00291	-0.00053	1.17e-06	-0.000221932	-0.00049	-0.00032
	sniffing	-0.45476	0.166814	-0.2186	-0.12099	-0.162629	-0.21538	-0.22403
	indicator Group	object
	baseline	0.004319	-0.00025	0.000778	-0.00082	-0.00069	-0.00217	-0.00029
	sniffing	-0.1753	-0.08707	-0.04369	0.028233	-0.05657	0.151119	-0.03886
Figure2 S3B	indicator Group	partner
	baseline	-0.0031	-0.00266	0.003179	0.000313	-0.00029	7.2e-05	0.000536
	sniffing	-2.03989	-1.4243	-1.63829	-0.36074	-1.01975	-0.52343	-0.13715
	indicator Group	stranger
	baseline	0.003582	-0.00945	-0.00236	0.000647	-0.00101	0.000809	0.000187
	sniffing	-0.60915	-0.44375	-0.37776	-0.18615	-0.11142	-0.16767	-0.11199
	indicator Group	object
	baseline	-0.0004	-0.00024	0.000265	-0.00174	0.001444	-0.00025	-0.00183
	sniffing	-0.07683	-0.00044	-0.05468	0.209539	-0.1472	-0.19147	0.355451
Figure2 S3	test type		Exact P-value, F-value with degree of freedom for ANOVAs, t-value with degree of freedom for t-tests
A	partner: Paired t test		t (6) = 2.936, p = 0.0261
	stranger: Paired t test		t (6) = 2.499, p = 0.0466
	object: Paired t test		t (6) = 0.8186, p = 0.4443
B	partner: Paired t test		t (6) = 3.792, p = 0.0091
	stranger: Paired t test		t (6) = 3.935, p = 0.0077
	object: Paired t test		t (6) = 0.1841, p = 0.8600
