# Supplementary material for: Different roles of D1/D2 medium spiny neurons in the nucleus accumbens in pair bond formation of male mandarin voles
Source: eLife. 2025 Jun 6;13:RP100292. doi: 10.7554/eLife.100292 (PMC12143883; doi:10.7554/eLife.100292)
Supplement: Figure 2—figure supplement 4—source data 1. [file elife-100292-fig2-figsupp4-data1.xlsx]

## Sheet: Sheet1
Figure2 S4A	indicator Group	cagemate
	baseline	-0.00041	-0.00195	-0.0003	-0.00051	0.000611	0.013393
	sniffing	0.057949	-0.03087	-0.1972	-0.57589	-0.54939	-0.28546
	indicator Group	stranger
	baseline	0.00042	0.000141	0.000518	-0.00219	-0.00523	0.005746
	sniffing	-0.3417	-0.28341	-0.0244	-0.56005	-0.73372	0.031685
	indicator Group	object
	baseline	-0.00094	-1e-05	-6.4e-06	0.000232	-0.00026	-0.00037
	sniffing	0.046313	-0.03685	0.015193	-0.01304	-0.05355	-0.00507
Figure2 S4B	indicator Group	cagemate
	baseline	0.002356	0.000406	-0.00028	0.001045	0.001287	0.000328
	sniffing	-0.46707	-0.11963	-0.15683	-0.04307	-0.61151	-0.41636
	indicator Group	stranger
	baseline	-0.00137	-5.4e-05	-0.00016	-0.00137	-0.001	-0.00132
	sniffing	-0.23776	-0.04307	-0.19399	-0.26804	-0.94428	-0.50783
	indicator Group	object
	baseline	-3.1e-05	-0.00087	0.000455	-0.00081	-0.00111	0.000166
	sniffing	-0.05055	0.022465	-0.08901	-0.06851	0.067325	-0.03527
Figure2 S4	test type		Exact P-value, F-value with degree of freedom for ANOVAs, t-value with degree of freedom for t-tests
A	cagemate: Paired t test		t (5) = 2.479, p = 0.00559
	stranger: Paired t test		t (5) = 2.654, p = 0.0452
	object: Paired t test		t (5) = 0.5164, p = 0.6276
B	cagemate: Paired t test		t (5) = 3.267, p = 0.0223
	stranger: Paired t test		t (5) =2.789, p = 0.0385
	object: Paired t test		t (5) = 1.035, p = 0.3479
