# Supplementary material for: Different roles of D1/D2 medium spiny neurons in the nucleus accumbens in pair bond formation of male mandarin voles
Source: eLife. 2025 Jun 6;13:RP100292. doi: 10.7554/eLife.100292 (PMC12143883; doi:10.7554/eLife.100292)
Supplement: Figure 2—figure supplement 5—source data 1. [file elife-100292-fig2-figsupp5-data1.xlsx]

## Sheet: Sheet1
Figure2 S5D	indicator Group	Mean of ΔF/F%
	3-baseline (n = 6)	-0.00312	-0.00242	-0.00012	-0.00482	-0.00156	-0.00541
	7-baseline (n = 6)	0.001929	-0.00083	0.000333	-0.00195	-0.00958	-0.00671
	3-carrot (n = 6)	-0.86828	-0.72853	-0.61128	-1.14268	-0.16587	-0.98224
	7-carrot (n = 6)	-0.36072	-0.49124	-0.61746	-1.58332	-1.42034	-1.28461
Figure2 S5	test type		Exact P-value, F-value with degree of freedom for ANOVAs, t-value with degree of freedom for t-tests
D	Two-Way Repeated Measures ANOVA		group × treatment: F (1, 5) = 0.7013, p = 0.4405; group: F (1, 5) = 0.6822, p = 0.4464; treatment: F (1, 5) = 42.67, p = 0.0013
