# Supplementary material for: Different roles of D1/D2 medium spiny neurons in the nucleus accumbens in pair bond formation of male mandarin voles
Source: eLife. 2025 Jun 6;13:RP100292. doi: 10.7554/eLife.100292 (PMC12143883; doi:10.7554/eLife.100292)
Supplement: Figure 2—figure supplement 6—source data 1. [file elife-100292-fig2-figsupp6-data1.xlsx]

## Sheet: Sheet1
Figure2 S6A-B	indicator Group	Mean of ΔF/F%
	3-partner	-0.20164	-0.14344	-0.08531	-0.47729	-0.03837	0.00249	-0.26407
	3-stranger	0.033889	-0.38704	-0.07244	0.370727	-0.41099	-0.13392	0.177276
	7-partner	-0.25593	0.061007	-0.13077	-0.13508	-0.18612	-0.21925	-0.02538
	7-stranger	0.164825	-0.04843	0.121425	-0.08287	0.137547
Figure2 S6	test type		Exact P-value, F-value with degree of freedom for ANOVAs, t-value with degree of freedom for t-tests
A	Two-tailed unpaired t-test		t (6) = 0.6936, p = 0.5139
B	Two-tailed unpaired t-test		t (10) = 2.813, p = 0.0184
