# Supplementary material for: Different roles of D1/D2 medium spiny neurons in the nucleus accumbens in pair bond formation of male mandarin voles
Source: eLife. 2025 Jun 6;13:RP100292. doi: 10.7554/eLife.100292 (PMC12143883; doi:10.7554/eLife.100292)
Supplement: Figure 2—figure supplement 7—source data 1. [file elife-100292-fig2-figsupp7-data1.xlsx]

## Sheet: Sheet1
Figure2 S7A	indicator Group	Mean of ΔF/F%
	3-freezing (n = 7)	0.002799	-0.18109	-0.13198	0.247543	0.104311	-0.01914	-0.08918
	3-exploring (n = 7)	-0.04854	-0.14665	-0.00648	-0.20027	0.298033	-0.18543	-0.18916
	3-groomnig (n = 7)	-0.0508	0.326236	-0.17242	-0.2674	0.026803	0.087553	-0.36984
	3-rearing (n = 7)	-0.02916	0.189267	0.166825	0.2355	0.063386	-0.04306	0.415957
	7-freezing (n = 7)	0.01392	-0.07694	-0.05399	-0.13702	0.009898	-0.13668	-0.024
	7-exploring (n = 7)	-0.04414	0.100334	-0.08755	-0.1427	0.111176	-0.10093	0.055935
	7-groomnig (n = 7)	-0.03949	0.2	0.2	0.02891	0.069855	-0.46461	-0.1279
	7-rearing (n = 7)	-0.05666	0.001969	-0.00426	-0.14754	0.155817	0.12106	0.048141
Figure2 S7B	indicator Group	Mean of ΔF/F%
	3 day
	partner (n = 7)	-1.45448	-0.57317	-0.29963	-0.23852	-0.181451	-0.49005	-0.22863
	stranger (n = 7)	-0.45476	0.166814	-0.2186	-0.12099	-0.162629	-0.21538	-0.22403
	object (n = 7)	-0.1753	-0.08707	-0.04369	0.028233	-0.05657	0.151119	-0.03886
	7 day
	partner (n = 7)	-2.03989	-1.4243	-1.63829	-0.36074	-1.01975	-0.52343	-0.13715
	stranger (n = 7)	-0.60915	-0.44375	-0.37776	-0.18615	-0.11142	-0.16767	-0.11199
	object (n = 7)	-0.07683	-0.00044	-0.05468	0.209539	-0.1472	-0.19147	0.355451
Figure2 S7C	indicator Group	Mean of ΔF/F%
	3 day
	partner (n = 7)	-1.45448	-0.57317	-0.29963	-0.23852	-0.181451	-0.49005	-0.22863
	stranger (n = 7)	-0.45476	0.166814	-0.2186	-0.12099	-0.162629	-0.21538	-0.22403
	object (n = 7)	-0.1753	-0.08707	-0.04369	0.028233	-0.05657	0.151119	-0.03886
	7 day
	partner (n = 7)	-2.03989	-1.4243	-1.63829	-0.36074	-1.01975	-0.52343	-0.13715
	stranger (n = 7)	-0.60915	-0.44375	-0.37776	-0.18615	-0.11142	-0.16767	-0.11199
	object (n = 7)	-0.07683	-0.00044	-0.05468	0.209539	-0.1472	-0.19147	0.355451
Figure2 S7	test type		Exact P-value, F-value with degree of freedom for ANOVAs, t-value with degree of freedom for t-tests
A	Two-Way Repeated Measures ANOVA		group × treatment: F (3, 18) = 0.8046, p = 0.5076; group: F (3, 18) = 1.891, p = 0.1672; treatment: F (1, 6) = 0.6753, p = 0.4426
B	Two-Way Repeated Measures ANOVA		group × treatment: F (2, 12) = 6.054, p = 0.0152; group: F (2, 12) = 15.51, p = 0.0005; treatment: F (1, 6) = 4.363, p = 0.0817
C	Two-Way Repeated Measures ANOVA		group × treatment: F (2, 10) = 0.0211, p = 0.9792; group: F (2, 10) = 8.527, p = 0.0069; treatment: F (1, 5) = 0.2301, p = 0.6517
