# Supplementary material for: Different roles of D1/D2 medium spiny neurons in the nucleus accumbens in pair bond formation of male mandarin voles
Source: eLife. 2025 Jun 6;13:RP100292. doi: 10.7554/eLife.100292 (PMC12143883; doi:10.7554/eLife.100292)
Supplement: Figure 2—figure supplement 8—source data 1. [file elife-100292-fig2-figsupp8-data1.xlsx]

## Sheet: Sheet1
Figure2 S8B	D2-GCaMP6m (n = 5)	D2-GCaMP6m+D1R-mRNA+/D2-GCaMP6m+(%)
		0.0930233	0.102041	0.148148	0.170213	0.214286
Figure2 S8C	D2-GCaMP6m (n = 5)	D2-GCaMP6m+D1R-mRNA+/D1R-mRNA+(%)
		0.285714	0.294118	0.307692	0.266667	0.157895
