# Supplementary material for: Different roles of D1/D2 medium spiny neurons in the nucleus accumbens in pair bond formation of male mandarin voles
Source: eLife. 2025 Jun 6;13:RP100292. doi: 10.7554/eLife.100292 (PMC12143883; doi:10.7554/eLife.100292)
Supplement: Figure 2—source data 1. [file elife-100292-fig2-data1.xlsx]

## Sheet: Sheet1
Figure 2C	D2-GCaMP (n = 6)	D2-GCaMP6m+D2R-mRNA+/D2-GCaMP6m+(%)						D2-GCaMP6m+D2R-mRNA+/D2R-mRNA+(%)
		82.9268	89.8305	80.8511	79.4872	88.2353	94.4444	94.4444	94.6429	97.4359	83.7838	93.75	87.1795
Figure 2F	indicator Group	Mean of ΔF/F%
	partner (n = 7)	-1.45448	-0.57317	-0.29963	-0.23852	-0.181451	-0.49005	-0.22863
	stranger (n = 7)	-0.45476	0.166814	-0.2186	-0.12099	-0.162629	-0.21538	-0.22403
	object (n = 7)	-0.1753	-0.08707	-0.04369	0.028233	-0.05657	0.151119	-0.03886
Figure 2I	indicator Group	Mean of ΔF/F%
	partner (n = 7)	-2.03989	-1.4243	-1.63829	-0.36074	-1.01975	-0.52343	-0.13715
	stranger (n = 7)	-0.60915	-0.44375	-0.37776	-0.18615	-0.11142	-0.16767	-0.11199
	object (n = 7)	-0.07683	-0.00044	-0.05468	0.209539	-0.1472	-0.19147	0.355451
Figure2	test type		Exact P-value, F-value with degree of freedom for ANOVAs, t-value with degree of freedom for t-tests
F	One-Way Repeated Measures ANOVA		F (1.373, 8.235) = 6.662, p = 0.0255; partner vs. stranger, p = 0.2092; partner vs. object, p = 0.0659, stranger vs. object, p = 0.2708
I	One-Way Repeated Measures ANOVA		F (1.212, 7.274) = 15.89, p = 0.0039; partner vs. stranger, p = 0.0366; partner vs. object, p = 0.0140, stranger vs. object, p = 0.0434
