# Supplementary material for: Different roles of D1/D2 medium spiny neurons in the nucleus accumbens in pair bond formation of male mandarin voles
Source: eLife. 2025 Jun 6;13:RP100292. doi: 10.7554/eLife.100292 (PMC12143883; doi:10.7554/eLife.100292)
Supplement: Figure 3—figure supplement 1—source data 1. [file elife-100292-fig3-figsupp1-data1.xlsx]

## Sheet: Sheet1
Figure3 S1B	D1-EGFP (n = 6)	D1-EGFP+D1R-mRNA+/D1-EGFP+(%)						D1-EGFP+D1R-mRNA+/D1R-mRNA+(%)
		78.8461	93.2203	96.2264	71.0526	85.7143	89.6552	95.3488	93.2203	96.2264	96.4286	95.4545	96.2963
Figure3 S1E	indicator Group	Mean of ΔF/F%
	partner (n = 5)	-0.0421717	-0.0273682	-0.0845638	0.0232468	0.00583232
	stranger (n = 5)	-0.00570775	0.042696	0.020419	0.0600144	0.0144647
	object (n = 5)	-0.00971712	0.00876796	0.0314937	0.00287907	0.00225021
Figure3 S1G	indicator Group	Mean of ΔF/F%
	partner (n = 5)	0.0029942	0.102008	0.0489256	0.0780201	-0.0771019
	stranger (n = 5)	0.235623	0.0668319	-0.0519122	0.0761517	-0.033078
	object (n = 5)	0.0368594	-0.0206837	0.00913035	-0.00994504	-0.000457914
Figure3 S1I	indicator Group	Mean of ΔF/F%
	cagemate (n = 5)	0.0120022	-0.0310466	0.0249468	0.00739016	-0.080001
	stranger (n = 5)	-0.0496565	0.0283404	0.0266264	0.160814	-0.0565869
	object (n = 5)	0.032034	-0.0929577	0.00068083	-0.0125946	0.00784963
Figure3 S1K	indicator Group	Mean of ΔF/F%
	cagemate (n = 5)	0.126273	0.00551028	-0.022519	-0.0208988	-0.00757253
	stranger (n = 5)	-0.0193403	-0.028375	-0.113882	-0.0743691	0.0365009
	object (n = 5)	-0.0114936	-0.00728106	0.0402448	0.0225066	0.071999
Figure3 S1	test type		Exact P-value, F-value with degree of freedom for ANOVAs, t-value with degree of freedom for t-tests
E	One-Way Repeated Measures ANOVA		F (2.000, 8.00) = 4.162, p = 0.0577
G	One-Way Repeated Measures ANOVA		F (2.000, 8.00) = 0.6909, p = 0.5287
I	One-Way Repeated Measures ANOVA		F (2.000, 8.00) = 0.5571, p = 0.5936
K	One-Way Repeated Measures ANOVA		F (2.000, 8.00) = 2.178, p = 0.1757
