# Supplementary material for: Different roles of D1/D2 medium spiny neurons in the nucleus accumbens in pair bond formation of male mandarin voles
Source: eLife. 2025 Jun 6;13:RP100292. doi: 10.7554/eLife.100292 (PMC12143883; doi:10.7554/eLife.100292)
Supplement: Figure 3—figure supplement 2—source data 1. [file elife-100292-fig3-figsupp2-data1.xlsx]

## Sheet: Sheet1
Figure3 S2F	indicator Group	Mean of ΔF/F%
	cagemate (n = 6)	0.156203	-0.15974	0.170844	0.397367	0.199841	0.043116
	stranger (n = 6)	0.348499	0.160519	0.184227	-0.09335	0.195995	0.11656
	object (n = 6)	-0.02298	0.032629	0.006271	-0.12528	0.083003	-0.04496
Figure3 S2I	indicator Group	Mean of ΔF/F%
	cagemate (n = 6)	0.040046	0.042201	0.257686	0.701372	0.304173	-0.01808
	stranger (n = 6)	-0.02462	0.260662	0.644322	0.56473	0.292082	0.126156
	object (n = 6)	-0.07713	0.105068	-0.0473	-0.08258	-0.03009	-0.0483
Figure3 S2	test type		Exact P-value, F-value with degree of freedom for ANOVAs, t-value with degree of freedom for t-tests
F	One-Way Repeated Measures ANOVA		F (2.000, 10.00) = 2.054, p = 0.1790;
I	One-Way Repeated Measures ANOVA		F (2.000, 10.00) = 5.533, p = 0.0241; stranger vs. object, p = 0.0278
