# Supplementary material for: Different roles of D1/D2 medium spiny neurons in the nucleus accumbens in pair bond formation of male mandarin voles
Source: eLife. 2025 Jun 6;13:RP100292. doi: 10.7554/eLife.100292 (PMC12143883; doi:10.7554/eLife.100292)
Supplement: Figure 3—figure supplement 3—source data 1. [file elife-100292-fig3-figsupp3-data1.xlsx]

## Sheet: Sheet1
Figure3 S3A	indicator Group	partner
	baseline	-0.00036	-0.00108	-0.0019	-0.00138	0.000176	-0.00049	0.000383
	sniffing	0.324354	0.167202	0.56936	0.707882	0.051839	0.222296	-0.06849
	indicator Group	stranger
	baseline	0.000711	0.001889	-0.00018	0.000829	0.00031	0.000476	-0.00335
	sniffing	0.394147	0.084084	0.309065	0.444225	-0.06748	-0.05082	0.265293
	indicator Group	object
	baseline	-0.00358	0.004554	0.000457	0.000541	-0.00409	-0.00014	-0.00016
	sniffing	0.111296	-0.01116	-0.00569	-0.08562	0.094947	-0.30278	0.003877
Figure3 S3B	indicator Group	partner
	baseline	0.000656	0.042992	0.004975	0.006658	0.000613	-9.9e-05	-0.00094
	sniffing	0.423457	0.558048	1.27857	1.41408	0.402173	0.052853	0.59838
	indicator Group	stranger
	baseline	-0.00277	0.000517	0.001602	0.002344	-0.00207	-1.1e-15	9.85e-05
	sniffing	0.256051	-0.04772	0.903326	0.732576	0.358624	-0.09064	0.222919
	indicator Group	object
	baseline	-0.00103	-0.00113	-0.00062	0.000143	-2.3e-05	0.001588	0.002398
	sniffing	0.083497	0.02215	-0.00477	-0.23086	-0.09412	-0.06718	-0.18281
Figure3 S3	test type		Exact P-value, F-value with degree of freedom for ANOVAs, t-value with degree of freedom for t-tests
A	partner: Paired t test		t (6) = 2.700, p = 0.0356
	stranger: Paired t test		t (6) = 2.492, p = 0.0470
	object: Paired t test		t (6) = 0.5216, p = 0.6207
B	partner: Paired t test		t (6) = 3.591, p = 0.0115
	stranger: Paired t test		t (6) = 2.381, p = 0.0547
	object: Paired t test		t (6) = 1.590, p = 0.1630
