# Supplementary material for: Different roles of D1/D2 medium spiny neurons in the nucleus accumbens in pair bond formation of male mandarin voles
Source: eLife. 2025 Jun 6;13:RP100292. doi: 10.7554/eLife.100292 (PMC12143883; doi:10.7554/eLife.100292)
Supplement: Figure 3—figure supplement 4—source data 1. [file elife-100292-fig3-figsupp4-data1.xlsx]

## Sheet: Sheet1
Figure3 S4A	indicator Group	cagemate
	baseline	0.000169	-0.0002	-0.00018	0.000845	0.000169	0.000262
	sniffing	0.156203	-0.15974	0.170844	0.397367	0.199841	0.043116
	indicator Group	stranger
	baseline	0.003283	-0.00236	-0.00055	-0.00096	0.000443	0.000898
	sniffing	0.348499	0.160519	0.184227	-0.09335	0.195995	0.11656
	indicator Group	object
	baseline	0.000197	0.001973	0.000358	0.002437	-7.5e-05	0.000313
	sniffing	-0.02298	0.032629	0.006271	-0.12528	0.083003	-0.04496
Figure3 S4B	indicator Group	cagemate
	baseline	-0.00045	0.00032	0.001558	-0.00017	-0.00035	0.002235
	sniffing	0.040046	0.042201	0.257686	0.701372	0.304173	-0.01808
	indicator Group	stranger
	baseline	0.001458	-0.00087	0.00094	-0.00131	-0.00207	-0.00042
	sniffing	-0.02462	0.260662	0.644322	0.56473	0.292082	0.126156
	indicator Group	object
	baseline	-0.0003	-0.00176	-0.00056	0.001906	0.000416	-0.00012
	sniffing	-0.07713	0.105068	-0.0473	-0.08258	-0.03009	-0.0483
Figure3 S4	test type		Exact P-value, F-value with degree of freedom for ANOVAs, t-value with degree of freedom for t-tests
A	cagemate: Paired t test		t (5) = 1.788, p = 0.1338
	stranger: Paired t test		t (5) = 2.613, p = 0.0475
	object: Paired t test		t (5) = 0.4349, p = 0.6818
B	cagemate: Paired t test		t (5) = 2.009, p = 0.1008
	stranger: Paired t test		t (5) = 2.983, p = 0.0307
	object: Paired t test		t (5) = 1.049, p = 0.3420
