# Supplementary material for: Different roles of D1/D2 medium spiny neurons in the nucleus accumbens in pair bond formation of male mandarin voles
Source: eLife. 2025 Jun 6;13:RP100292. doi: 10.7554/eLife.100292 (PMC12143883; doi:10.7554/eLife.100292)
Supplement: Figure 3—figure supplement 5—source data 1. [file elife-100292-fig3-figsupp5-data1.xlsx]

## Sheet: Sheet1
Figure3 S5D	indicator Group	Mean of ΔF/F%
	3-baseline (n = 8)	0.000529	0.003152	-9.7e-05	0.000185	-8.4e-05	0.004473	0.00064	0.001021
	7-baseline (n = 8)	0.000656	0.000284	8.29e-05	-2.1e-14	0.001509	-0.00062	0.000135	0.000753
	3-carrot (n = 8)	0.853133	1.30747	0.60403	-0.08341	0.834435	0.370147	-0.03203	0.253292
	7-carrot (n = 8)	1.17706	0.537607	0.691899	-0.00708	0.544955	-0.03296	-0.01927	0.054973
Figure3 S5D	test type		Exact P-value, F-value with degree of freedom for ANOVAs, t-value with degree of freedom for t-tests
D	Two-Way Repeated Measures ANOVA		group × treatment: F (1, 7) = 1.1413, p = 0.2733; group: F (1, 7) = 1.428, p = 0.2711; treatment: F (1, 7) = 8.499, p = 0.0225
