# Supplementary material for: Different roles of D1/D2 medium spiny neurons in the nucleus accumbens in pair bond formation of male mandarin voles
Source: eLife. 2025 Jun 6;13:RP100292. doi: 10.7554/eLife.100292 (PMC12143883; doi:10.7554/eLife.100292)
Supplement: Figure 3—figure supplement 6—source data 1. [file elife-100292-fig3-figsupp6-data1.xlsx]

## Sheet: Sheet1
Figure3 S6A-B	indicator Group	Mean of ΔF/F%
	3-partner	0.088946	-0.03347	0.220204	0.10124
	3-stranger	-0.23903	0.184547	-0.32812	-0.21297
	7-partner	0.040832	0.014293	0.064312	0.070114	0.163316	0.63701
	7-stranger	-0.21192	-0.12865	-0.18587
Figure3 S6	test type		Exact P-value, F-value with degree of freedom for ANOVAs, t-value with degree of freedom for t-tests
A	Two-tailed unpaired t-test		t (6) = 1.943, p = 0.1000
B	Two-tailed unpaired t-test		t (7) = 2.392, p = 0.0481
