# Supplementary material for: Different roles of D1/D2 medium spiny neurons in the nucleus accumbens in pair bond formation of male mandarin voles
Source: eLife. 2025 Jun 6;13:RP100292. doi: 10.7554/eLife.100292 (PMC12143883; doi:10.7554/eLife.100292)
Supplement: Figure 3—figure supplement 7—source data 1. [file elife-100292-fig3-figsupp7-data1.xlsx]

## Sheet: Sheet1
Figure3 S7A	indicator Group	Mean of ΔF/F%
	3-freezing (n = 7)	-0.10251	-0.08425	-0.03385	-0.02319	-0.0221	0.098743	-0.06011
	3-exploring (n = 7)	-0.07363	0.033038	-0.04061	-0.07864	-0.0566	-0.06	0.020628
	3-groomnig (n = 7)	-0.17302	-0.1086	-0.07612	0.049453	0.085774	-0.07343	-0.14378
	3-rearing (n = 7)	0.097967	-0.05763	0.042675	-0.03505	0.107845	0.138182	-0.14467
	7-freezing (n = 7)	-0.00249	-0.02793	-0.03417	-0.11617	0.017282	0.03017	-0.14362
	7-exploring (n = 7)	0.063265	0.026455	-0.1247	-0.09106	-0.00559	0.030025	-0.00833
	7-groomnig (n = 7)	-0.22861	-0.06739	-0.27474	-0.36707	0.108752	0.034857	0.140046
	7-rearing (n = 7)	0.055521	-0.06734	-0.02467	-0.00573	-0.10601	0.019594	-0.04647
Figure3 S7B	indicator Group	Mean of ΔF/F%
	3 day
	partner (n = 7)	0.324354	0.167202	0.56936	0.707882	0.0518394	0.222296	-0.06849
	stranger (n = 7)	0.394147	0.084084	0.309065	0.444225	-0.0674778	-0.05082	0.265293
	object (n = 7)	0.111296	-0.01116	-0.00569	-0.08562	0.0949472	-0.30278	0.003877
	7 day
	partner (n = 7)	0.423457	0.558048	1.27857	1.41408	0.402173	0.052853	0.59838
	stranger (n = 7)	0.256051	-0.04772	0.903326	0.732576	0.358624	-0.09064	0.222919
	object (n = 7)	0.083497	0.02215	-0.00477	-0.23086	-0.09412	-0.06718	-0.18281
Figure3 S7C	indicator Group	Mean of ΔF/F%
	3 day
	cagemate (n = 6)	0.156203	-0.15974	0.170844	0.397367	0.199841	0.043116
	stranger (n = 6)	0.348499	0.160519	0.184227	-0.09335	0.195995	0.11656
	object (n = 6)	-0.02298	0.032629	0.006271	-0.12528	0.083003	-0.04496
	7 day
	cagemate (n = 6)	0.040046	0.042201	0.257686	0.701372	0.304173	-0.01808
	stranger (n = 6)	-0.02462	0.260662	0.644322	0.56473	0.292082	0.126156
	object (n = 6)	-0.07713	0.105068	-0.0473	-0.08258	-0.03009	-0.0483
Figure3 S7	test type		Exact P-value, F-value with degree of freedom for ANOVAs, t-value with degree of freedom for t-tests
A	Two-Way Repeated Measures ANOVA		group × treatment: F (3, 18) = 0.3340, p = 0.8009; group: F (3, 18) = 1.527, p = 0.2418; treatment: F (1, 6) = 0.3764, p = 0.5621
B	Two-Way Repeated Measures ANOVA		group × treatment: F (2, 12) = 4.496, p = 0.0349; group: F (2, 12) = 11.67, p = 0.0015; treatment: F (1, 6) = 7.372, p = 0.0349
C	Two-Way Repeated Measures ANOVA		group × treatment: F (2, 10) = 1.406, p = 0.2897; group: F (2, 10) = 5.215, p = 0.0281; treatment: F (1, 5) = 1.111, p = 0.3400
