# Supplementary material for: Different roles of D1/D2 medium spiny neurons in the nucleus accumbens in pair bond formation of male mandarin voles
Source: eLife. 2025 Jun 6;13:RP100292. doi: 10.7554/eLife.100292 (PMC12143883; doi:10.7554/eLife.100292)
Supplement: Figure 3—figure supplement 8—source data 1. [file elife-100292-fig3-figsupp8-data1.xlsx]

## Sheet: Sheet1
Figure3 S8B	D1-GCaMP6m (n = 5)	D1-GCaMP6m+D2R-mRNA+/D1-GCaMP6m+(%)
		0.212766	0.235294	0.272727	0.132075	0.2
Figure3 S8C	D1-GCaMP6m (n = 5)	D1-GCaMP6m+D2R-mRNA+/D1R-mRNA+(%)
		0.322581	0.25	0.272727	0.318182	0.16
