# Supplementary material for: Different roles of D1/D2 medium spiny neurons in the nucleus accumbens in pair bond formation of male mandarin voles
Source: eLife. 2025 Jun 6;13:RP100292. doi: 10.7554/eLife.100292 (PMC12143883; doi:10.7554/eLife.100292)
Supplement: Figure 3—source data 1. [file elife-100292-fig3-data1.xlsx]

## Sheet: Sheet1
Figure 3C	D1-GCaMP (n = 6)	D1-GCaMP6m+D1R-mRNA+/D1-GCaMP6m+(%)						D1-GCaMP6m+D1R-mRNA+/D1R-mRNA+(%)
		84.9057	76.4706	94.8276	79.0698	76.7857	94.4444	90	92.8571	94.8276	85	87.7551	91.8919
Figure 3F	indicator Group	Mean of ΔF/F%
	partner (n = 7)	0.324354	0.167202	0.56936	0.707882	0.0518394	0.222296	-0.06849
	stranger (n = 7)	0.394147	0.084084	0.309065	0.444225	-0.0674778	-0.05082	0.265293
	object (n = 7)	0.111296	-0.01116	-0.00569	-0.08562	0.0949472	-0.30278	0.003877
Figure 3I	indicator Group	Mean of ΔF/F%
	partner (n = 7)	0.423457	0.558048	1.27857	1.41408	0.402173	0.052853	0.59838
	stranger (n = 7)	0.256051	-0.04772	0.903326	0.732576	0.358624	-0.09064	0.222919
	object (n = 7)	0.083497	0.02215	-0.00477	-0.23086	-0.09412	-0.06718	-0.18281
Figure3	test type		Exact P-value, F-value with degree of freedom for ANOVAs, t-value with degree of freedom for t-tests
F	One-Way Repeated Measures ANOVA		F (2.000, 12.00) = 5.297, p = 0.0184; partner vs. object, p = 0.0249
I	One-Way Repeated Measures ANOVA		F (1.242, 7.451) = 11.11, p = 0.0093; partner vs. stranger, p = 0.0278, partner vs. object, p = 0.0326
