# Supplementary material for: Different roles of D1/D2 medium spiny neurons in the nucleus accumbens in pair bond formation of male mandarin voles
Source: eLife. 2025 Jun 6;13:RP100292. doi: 10.7554/eLife.100292 (PMC12143883; doi:10.7554/eLife.100292)
Supplement: Figure 4—source data 1. [file elife-100292-fig4-data1.xlsx]

## Sheet: Sheet1
Figure 4C	indicator Group	sEPSC frequency (Hz)
	control (n = 11 cells from 4 voles)	0.902026	1.07149	1.71739	2.0871	2.13677	2.75675	1.67731	2.64413	2.26497	2.23764	1.26637
	cohabitation (n = 11cells from 4 voles)	2.00633	2.26329	3.23469	3.35248	6.02286	3.02377	2.75988	3.09505	3.22195	2.71253	3.76816
Figure 4C	indicator Group	sEPSC amplitude (pA)
	control ( n = 11 cells from 4 voles)	17.7181	17.4642	16.3065	12.8626	18.718	18.9636	23.8073	18.6983	18.2267	16.4649	14.0717
	cohabitation ( n = 11 cells from 4 voles)	20.7791	19.3383	16.9167	17.8787	21.0632	22.5606	20.7566	21.9386	23.984	22.378	17.4767
Figure 4D	indicator Group	sIPSC frequency (Hz)
	control (n=14 cells from 4 voles)	1.59994	1.25409	1.32554	0.773607	1.21039	2.31168	1.3126	1.77191	1.15483	0.942925	1.67413	0.559729	0.466082	0.477821
	cohabitation (n = 14 cells from 4 voles)	1.77212	1.60821	1.17153	1.36977	1.32374	2.32487	1.89942	3.24671	1.78217	2.32224	0.949769	0.954518	1.52715	1.09341
Figure 4D	indicator Group	sIPSC amplitude (pA)
	control (n = 14 cells from 4 voles)	18.3591	20.0142	26.2751	20.5177	25.7985	18.4216	20.167	17.3121	13.2807	21.8006	15.8672	12.6808	17.3671	15.3532
	cohabitation (n = 14 cells from 4 voles)	21.3046	22.4041	17.1884	19.8548	23.8529	18.4639	18.7654	19.5313	19.7135	19.4059	15.9789	18.1764	16.1355	21.6251
Figure 4F	indicator current injection (pA)	Averg.Inst.Fre.(Hz)
	Group	control (n = 13 cells from 6 voles)													cohabitation (n = 11 cells from 4 voles)
	0	0	0	0	0	0	0	0	0	0	0	0	0	0	0	0	0	0	0	0	0	0	0	0	0
	25	0	0	0	0	0	0	0	0	0	6.91113	0	0	0	0	0	0	0	0	0	0	5.77849	0	0	0
	50	0	0	0	0	4.97457	0	0	0	9.65135	22.5799	0	0	0	0	0	0	11.9777	0	0	0	10.7186	0	0	17.6263
	75	0	9.93025	0	0	15.2176	0	9.77009	0	41.3542	29.6928	0	0	8.94301	0	0	0	21.2803	0	12.2986	0	11.7752	0	0	28.7883
	100	0	20.3138	0	0	23.5901	0	16.7783	0	55.8196	40.867	0	0	12.9252	21.6471	19.7385	0	25.0731	18.2332	19.7908	10.0636	16.2311	10.929	0	32.4549
	125	11.761	26.6485	12.2216	0	36.9458	0	19.5998	0	64.9062	44.5774	0	9.39104	13.3715	26.3216	24.662	0	27.7731	21.484	23.9445	17.1918	22.2592	18.8404	0	33.7664
	150	18.8841	29.6955	11.4851	13.8888	46.4081	16.4472	21.175	0	73.6916	50.0863	0	11.2663	21.0525	29.0719	26.9628	0	28.7991	23.5058	26.0774	21.9424	22.779	27.8247	23.1706	37.2639
	175	24.1394	32.2106	15.1382	19.2693	59.5226	17.298	21.6185	5.52798	79.4578	53.413	9.27008	12.8742	0	30.6888	27.3142	0	28.9973	24.4516	27.6902	24.6143	26.2434	28.3596	27.0352	40.9857
	200	27.9653	33.8222	15.4475	21.6431	62.8361	17.7437	21.8244	11.3203	86.6975	58.6403	19.115	13.1987	0	31.3517	27.7289	4.8549	30.516	24.1316	27.3617	27.1956	29.5358	36.7023	34.3638	38.19
Figure 4G	indicator current injection (pA)	Spike Numbers
	Group	control (n = 13 cells from 6 voles)													cohabitation (n = 11 cells from 4 voles)
	0	0	0	0	0	0	0	0	0	0	0	0	0	0	0	0	0	0	0	0	0	0	0	0	0
	25	0	0	0	0	0	0	0	0	0	5	0	0	0	0	0	0	0	0	0	0	4	0	0	0
	50	0	0	0	0	5	0	0	0	8	13	0	0	0	0	0	0	10	0	0	0	9	0	0	12
	75	0	5	0	0	15	0	7	0	40	18	0	0	3	0	0	0	20	0	7	0	8	0	0	22
	100	0	16	1	0	15	0	15	0	55	21	0	0	10	13	15	0	24	13	16	6	11	2	0	22
	125	7	23	3	0	7	0	19	0	65	30	0	7	7	23	22	0	27	18	20	13	8	13	0	42
	150	15	27	8	10	6	2	20	1	74	32	0	7	2	27	24	0	28	20	24	19	11	3	17	12
	175	21	30	11	15	5	10	21	3	79	30	8	6	1	28	25	0	28	22	26	22	9	4	25	9
	200	25	32	13	19	5	14	17	9	64	35	18	4	1	29	26	4	21	22	26	25	10	4	34	9
Figure 4H	indicator Group	Rheobase(pA)
	control (n = 13 cells from 6 voles)	125	75	100	150	50	150	75	150	50	25	175	125	75
	cohabitation (n = 11 cells from 4 voles)	100	100	200	50	75	100	100	100	25	100	150
Figure 4J	indicator Group	Normalized E/I ratio
	control (n = 5 cells from 3 voles)	0.885851	0.878064	0.956524	1.44619	0.833371
	cohabitation (n = 7 cells from 4 voles)	7.91437	7.56304	2.77575	1.1664	2.5562	8.59229	4.34769
Figure 4L	indicator Group	sEPSC frequency (Hz)
	control-baseline ( n = 8 cells from 3 voles)	2.26629	1.76266	1.18171	1.3191	0.928564	2.78028	2.05235	0.725646
	control-DA (n = 8 cells from 3 voles)	1.86336	1.44984	0.631398	0.805978	0.914618	1.81759	1.75996	0.537899
	cohabitation-baseline (n = 8 cells from 4 voles)	2.46221	3.24706	3.58933	1.55267	2.23764	2.45591	2.55626	2.81676
	cohabitation-DA (n = 8 cells from 4 voles)	1.79478	1.59742	4.22366	1.34999	2.51537	1.16515	2.95825	1.73903
Figure 4L	indicator Group	sEPSC amplitude (pA)
	control-baseline ( n = 8 cells from 3 voles)	21.9129	19.4999	14.9295	15.8347	25.6414	14.2912	19.5508	15.7122
	control-DA (n = 8 cells from 3 voles)	20.2846	14.091	12.5745	14.1523	24.805	13.8099	16.761	14.4052
	cohabitation-baseline (n = 8 cells from 4 voles)	24.6396	19.8454	25.1578	23.6071	16.4649	21.5579	22.8453	23.3377
	cohabitation-DA (n = 8 cells from 4 voles)	22.9941	19.818	24.2453	17.7206	15.8886	21.5241	22.6484	22.1567
Figure 4	test type		Exact P-value, F-value with degree of freedom for ANOVAs, t-value with degree of freedom for t-tests
C	Two-tailed unpaired t-test		frequency: t (20) = -3.634, p = 0.002; amplitude: t (20) = -2.619, p = 0.016
D	Two-tailed unpaired t-test		frequency: t (26) = -2.096, p = 0.046; amplitude: t (26) = -0.528, p = 0.602
F	Two-Way Repeated Measures ANOVA		group × treatment: F (8, 198) = 0.070, p = 0.999; group: F (1, 198) = 0.0003, p = 0.986; treatment: F (8, 198) = 16.767, p < 0.0001
G	Two-Way Repeated Measures ANOVA		group × treatment: F (8, 198) = 0.103, p = 0.999; group: F (1, 198) = 0.078, p = 0.780; treatment: F (8, 198) = 10.095, p < 0.0001
H	Two-tailed unpaired t-test		t (22) = 0.100, p = 0.921
J	Two-tailed unpaired t-test		t (10) = -3.499, p = 0.012
L	Two-Way Repeated Measures ANOVA with Sidak's multiple comparison test		frequencies: group × treatment: F (1, 14) = 0.0177, p = 0.896; group: F (1, 14) = 8.105, p = 0.0129; treatment: F (1, 14) = 7.189, p = 0.0179, Control_ Baseline vs Control DA, p = 0.0050, Cohabitation _ Baseline vs Cohabitation DA, p = 0.2296, Control_ Baseline vs Cohabitation Baseline, p = 0.0277, Control _DA vs Cohabitation DA, p = 0.0376; amplitude: group × treatment: F (1, 14) = 0.7937, p = 0…
