# Supplementary material for: Different roles of D1/D2 medium spiny neurons in the nucleus accumbens in pair bond formation of male mandarin voles
Source: eLife. 2025 Jun 6;13:RP100292. doi: 10.7554/eLife.100292 (PMC12143883; doi:10.7554/eLife.100292)
Supplement: Figure 5—source data 1. [file elife-100292-fig5-data1.xlsx]

## Sheet: Sheet1
Figure 5C	indicator Group	sEPSC frequency (Hz)
	control (n = 16 cells from 4 voles)	1.76238	3.13056	2.94094	2.5114	1.33422	1.23098	1.06825	1.27386	2.26629	1.76266	1.18171	1.3191	0.776312	2.78028	2.05235	0.725646
	cohabitation (n = 19 cells from 5 voles)	0.656255	0.613364	0.582514	0.548274	2.85497	0.777402	0.780768	0.668056	0.903539	0.887581	1.71337	0.789139	0.654484	1.88382	0.780477	1.23222	1.63913	1.84991	1.01491
Figure 5C	indicator Group	sEPSC amplitude (pA)
	control (n = 16 cells from 4 voles)	15.917	14.9877	14.6544	15.8479	18.4992	17.7008	18.6162	20.0716	21.9129	19.4999	14.9295	15.8347	16.4854	14.2912	19.5508	15.7122
	cohabitation (n = 19 cells from 5 voles)	14.487	8.80306	9.14521	15.5278	15.6384	11.1558	12.1236	12.9598	15.5718	17.2955	14.8011	12.8221	14.0162	14.8995	15.4635	15.502	16.8096	20.3109	14.1778
Figure 5D	indicator Group	sIPSC frequency (Hz)
	control (n = 10 cells from 3 voles)	1.175	2.15792	1.68174	1.64868	1.09567	0.625216	1.30034	1.78586	1.81369	0.654887
	cohabitation (n = 16 cells from 4 voles)	1.41568	1.33961	1.81466	0.451269	0.869108	0.911792	0.734746	0.746968	1.42196	1.26333	0.422089	0.701409	0.372847	1.30062	1.13427	0.330028
Figure 5D	indicator Group	sIPSC amplitude (pA)
	control (n = 10 cells from 3 voles)	22.9992	18.329	16.2888	18.9088	18.9202	19.9894	20.0506	21.3001	26.336	13.3837
	cohabitation (n = 16 cells from 4 voles)	26.7825	25.1106	17.3823	20.7821	17.0365	14.3526	18.0501	14.1735	16.5763	15.6668	18.9604	21.9998	20.3176	22.134	20.2152	22.5436
Figure 5F	indicator current injection (pA)	Averg.Inst.Fre.(Hz)
	Group	control (n = 8 cells from 4 voles)								cohabitation (n = 8 cells from 3 voles)
	0	0	0	0	0	0	0	0	0	0	0	0	0	0	0	0	0
	25	0	0	0	0	0	0	0	0	0	0	0	0	0	0	0	0
	50	0	0	0	0	0	0	0	0	0	0	8.91842	0	0	6.10869	0	0
	75	6.15763	0	0	0	0	8.2547	0	15.4466	8.57636	0	15.0172	7.65158	9.79465	12.296	0	0
	100	9.3175	0	0	0	0	16.1414	16.9383	27.1754	17.0601	0	18.6042	16.776	14.1497	20.8107	14.8125	10.8553
	125	13.216	0	0	0	0	19.4482	22.3576	32.0876	20.9448	12.2461	19.3191	20.8913	17.6044	22.9723	20.0604	18.5377
	150	16.3514	6.27196	0	0	0	23.4632	26.5748	34.9373	23.0349	15.2444	19.4256	24.1349	19.2868	23.9851	23.4047	22.7636
	175	31.0715	9.14274	13.4317	13.0192	9.86207	25.6175	28.3059	37.6388	23.4632	17.2713	21.4142	27.1334	20.18	23.4749	24.965	25.3709
	200	39.7144	12.0619	21.4187	18.1257	7.09175	27.9767	30.6386	39.4128	24.1122	19.2699	24.2739	39.9034	23.8872	24.2091	26.0401	26.9022
Figure 5G	indicator current injection (pA)	Spike Numbers
	Group	control (n = 8 cells from 4 voles)								cohabitation (n = 8 cells from 3 voles)
	0	0	0	0	0	0	0	0	0	0	0	0	0	0	0	0	0
	25	0	0	0	0	0	0	0	0	0	0	0	0	0	0	0	0
	50	0	0	0	0	0	0	0	0	0	0	7	0	0	2	0	0
	75	4	0	0	0	0	8	0	9	2	0	14	6	8	11	1	0
	100	6	0	0	0	0	16	13	23	13	0	19	14	13	20	12	4
	125	6	0	0	0	0	20	21	29	18	9	19	20	17	22	18	14
	150	5	5	0	0	0	23	26	33	20	13	16	24	18	23	21	20
	175	3	9	5	6	2	26	28	36	21	16	11	9	19	23	23	23
	200	3	10	13	12	6	28	31	39	22	18	8	4	8	18	25	25
Figure 5H	indicator Group	Rheobase(pA)
	control	75	150	175	175	175	100	100	75
	cohabitation	75	125	50	75	75	50	75	100
Figure 5J	indicator Group	Normalized E/I ratio
	control (n = 8 cells from 4 voles)	1.44842	0.385185	0.340355	0.459799	2.36624
	cohabitation (n = 8 cells from 3 voles)	0.893612	0.483618	0.893612	0.483618	3.79369	4.02686	1.67109	0.802484	5.42304
Figure 5L	indicator Group	sEPSC frequency (Hz)
	control-baseline ( n = 10 cells from 4 voles)	1.56464	2.66537	1.34666	1.58289	1.75956	1.26714	1.3391	1.90972	1.16993	1.56563
	control-DA (n = 10 cells from 4 voles)	1.73333	3.93723	1.71455	3.40057	2.13495	2.82327	1.31977	2.61836	0.949094	1.06371
	cohabitation-baseline (n = 10 cells from 5 voles)	0.83963	0.789139	0.654484	1.88382	0.780477	1.23222	1.13039	1.84991	1.01491	0.691148
	cohabitation-DA (n = 10 cells from 5 voles)	0.794833	0.709377	0.669327	1.97301	0.721	1.30248	1.07023	1.66869	1.18	0.882636
Figure 5L	indicator Group	sEPSC amplitude (pA)
	control-baseline ( n = 10 cells from 4 voles)	14.59	20.9204	20.6733	19.8165	21.8988	17.3024	17.2359	28.677	23.8425	24.7722
	control-DA (n = 10 cells from 4 voles)	15.6223	20.8217	20.8831	17.1256	20.4071	17.0851	17.0873	30.7342	22.9684	24.305
	cohabitation-baseline (n = 10 cells from 5 voles)	22.2203	12.8221	14.0162	14.8995	15.4635	15.502	22.7796	20.3109	14.1778	16.3995
	cohabitation-DA (n = 10 cells from 5 voles)	22.1717	12.5899	15.0482	15.252	14.1627	14.9171	20.7341	18.3219	16.7851	16.4249
Figure 5	test type		Exact P-value, F-value with degree of freedom for ANOVAs, t-value with degree of freedom for t-tests
C	Two-tailed unpaired t-test		frequency: t (33) = 2.816, p = 0.008; amplitude: t (33) = 3.322, p = 0.002
D	Two-tailed unpaired t-test		frequency: t (24) = 2.324, p = 0.024; amplitude: t (24) = 0.100, p = 0.921
F	Two-Way Repeated Measures ANOVA		group × treatment: F (8, 126) = 0.778, p = 0.623; group: F (1, 126) = 7.757, p = 0.006; treatment: F (8, 126) = 29.810, p <0.0001
G	Two-Way Repeated Measures ANOVA		group × treatment: F (8, 126) = 0.845, p = 0.565; group: F (1, 126) = 5.440, p = 0.021; treatment: F (8, 126) = 15.757, p < 0.0001
H	Two-tailed unpaired t-test		t (14) = 2.744, p = 0.016
J	Two-tailed unpaired t-test		t (12) = -1.429, p = 0.179
L	Two-Way Repeated Measures ANOVA with Sidak's multiple comparison test		frequencies: group × treatment: F (1, 18) = 4.784, p = 0.0422; group: F (1, 18) = 9.954, p = 0.0055; treatment: F (1, 18) =5.164, p = 0.0356, Control_ Baseline vs Control DA, p = 0.006, Cohabitation _ Baseline vs Cohabitation DA, p = 0.953, Control Baseline vs Cohabitation _ Baseline, p = 0.015, Control DA vs Cohabitation DA, p = 0.006; amplitude: group ×treatment: F (1, 18) = 0.007, p = 0.9343; …
