# Supplementary material for: Different roles of D1/D2 medium spiny neurons in the nucleus accumbens in pair bond formation of male mandarin voles
Source: eLife. 2025 Jun 6;13:RP100292. doi: 10.7554/eLife.100292 (PMC12143883; doi:10.7554/eLife.100292)
Supplement: Figure 6—figure supplement 1—source data 1. [file elife-100292-fig6-figsupp1-data1.xlsx]

## Sheet: Sheet1
Figure6 S1B	Gq (n = 3)	hM3Dq-mCherry+D2R+/hM3Dq-mCherry+(%)
		86.6667	86.3636	97.2973
Figure6 S1D	Gi (n = 3)	hM4Di-mCherry+D2R+/hM4Di-mCherry+(%)
		86.6667	86.2069	95.2381
Figure6 S1F	mCherry (n = 3)	D2-mCherry+D2R+/D2-mCherry+(%)
		85.7143	91.1765	90.9091
