# Supplementary material for: Different roles of D1/D2 medium spiny neurons in the nucleus accumbens in pair bond formation of male mandarin voles
Source: eLife. 2025 Jun 6;13:RP100292. doi: 10.7554/eLife.100292 (PMC12143883; doi:10.7554/eLife.100292)
Supplement: Figure 6—figure supplement 2—source data 1. [file elife-100292-fig6-figsupp2-data1.xlsx]

## Sheet: Sheet1
Figure6 S2B	D2-mCherry (n = 3)	D2-mCherry+D1R-mRNA+/D2-mCherry+(%)
		28.2051	30.7692	27.907
Figure6 S2C	D2-mCherry (n = 3)	D2-mCherry+D1R-mRNA+/D1R-mRNA+(%)
		30.3922	26.3566	23.7705
