# Supplementary material for: Different roles of D1/D2 medium spiny neurons in the nucleus accumbens in pair bond formation of male mandarin voles
Source: eLife. 2025 Jun 6;13:RP100292. doi: 10.7554/eLife.100292 (PMC12143883; doi:10.7554/eLife.100292)
Supplement: Figure 6—source data 1. [file elife-100292-fig6-data1.xlsx]

## Sheet: Sheet1
Figure 6E	indicator Group	Social preference ratio
		CNO									saline
	Gq	0.463653	-0.33293	-0.4397	-0.60368	-0.66445	-0.67261	0.221324			-0.39496	0.400131	0.042182	-0.54065	0.147345	-0.76516	-0.22276	0.873859	-0.36129
	Gi	0.721653	0.559218	0.525842	0.887715	0.56568	-0.05814	0.74554	0.952471	0.660352	0.247241	-0.14352	0.46914	0.392365	0.003585	-0.89802	-0.90642	-0.65903
	mCherry	-0.14618	0.795902	0.091474	-0.23881	-0.60693	0.313208	-0.51491			0.093514	-0.56116	-0.62149	-0.22717	-0.76403	0.003454
Figure 6F	indicator Gq Group	Time (s)
	CNO-partner (n = 7)	648.12	1216.25	789	446.81	831	574.28	1236.56
	CNO-stranger (n = 7)	237.5	2430.31	2027.35	1808	4122.06	2934	788.39
	saline-partner (n = 9)	169.75	3117	3189.5	1504.13	3685.56	561.81	782.06	7580.78	3035.82
	saline-stranger (n = 9)	391.37	1335.44	2931.31	5044.81	2738.94	4222.75	1230.33	510.31	6470.21
Figure 6G	indicator Gi Group	Time (s)
	CNO-partner (n = 9)	4359.81	3877.19	3902.44	7456.06	4142.25	1396.75	5927.75	4720.08	4890.31
	CNO-stranger (n = 9)	704.87	1096.06	1212.69	443.5	1149.06	1569.19	864.13	114.9	1000.38
	saline-partner (n = 8)	3977.69	226.38	1498.06	1776.31	2887.5	406.03	170.5	726.37
	saline-stranger (n = 8)	2400.69	302.25	541.31	775.19	2866.87	7557.27	3473.56	3534.25
Figure 6H	indicator mCherry Group	Time (s)
	CNO-partner (n = 7)	534.81	5982.31	3138.12	2258.56	1142.44	2686.37	1152.62
	CNO-stranger (n = 7)	717.94	679.87	2612.12	3675.69	4670.44	1404.94	3599.56
	saline-partner (n = 6)	2663.63	595.25	1466.87	2918.19	928.56	726.25
	saline-stranger (n = 6)	2208.06	2117.56	6283.94	4633.75	6941.5	721.25
Figure 6I	indicator Group	Social preference ratio
		CNO									saline
	Gq	-0.2105	-0.05073	0.170349	-0.86181	0.535337	-0.66194	-0.97999			0.107369	0.220859	-0.02386	0.214079	-0.18403	0.758578	0.431667	0.761383	0.829802
	Gi	0.670679	-0.44735	0.665345	0.522849	0.505593	0.757602	0.051785	0.372122	0.764651	0.420126	0.099115	-0.01104	0.741402	0.181413	0.730762	0.810545	0.72048
	mCherry	0.558533	0.072187	0.866691	0.773183	0.647403	0.260013	0.341662			0.545676	0.631238	0.449143	0.622863	0.303166	0.152168
Figure 6J	indicator Gq Group	Time (s)
	CNO-partner (n = 7)	1752.12	2049.69	1689.44	423	4050.94	986.56	82.26
	CNO-stranger (n = 7)	2686.44	2268.75	1197.63	5699.12	1226	4850.12	8138.96
	saline-partner (n = 9)	926.63	3964.13	3488.19	4827.25	1704.94	6623.63	3314.31	2411.5	7199.12
	saline-stranger (n = 9)	746.94	2529.87	3658.69	3124.87	2474	909.31	1315.69	326.69	669.62
Figure 6K	indicator Gi Group	Time (s)
	CNO-partner (n = 9)	5230.06	1230.81	3824.88	4160.56	3621.75	7016.62	3801.94	1866.69	5316.09
	CNO-stranger (n = 9)	1030.94	3223.44	768.62	1303.62	1189.31	967.69	3427.56	854.19	709
	saline-partner (n = 8)	4100.75	3425.87	2870.25	6288.69	6137.93	4459.1	1439.13	6168.41
	saline-stranger (n = 8)	1674.44	2808	2934.31	933.87	4252.9	693.66	150.59	1002.16
Figure 6L	indicator mCherry Group	Time (s)
	CNO-partner (n = 7)	2511.63	3238.32	8387.63	4143.92	5498	4110.8	3124.98
	CNO-stranger (n = 7)	711.44	2802.27	599	530.07	1176.75	2414.21	1533.39
	saline-partner (n = 6)	6024.75	6189.12	6379.81	6750.25	2648.04	1431.5
	saline-stranger (n = 6)	1770.87	1399.13	2425.13	1568.69	1415.97	1053.38
Figure 6	test type		Exact P-value, F-value with degree of freedom for ANOVAs, t-value with degree of freedom for t-tests
E	Two-way ANOVA with Sidak's multiple comparison test		group × treatment: F (2, 40) = 4.942, p = 0.012; group: F (2, 40) = 4.265, p = 0.021; treatment: F (1, 40) = 4.967, p = 0.032; Gi_Saline vs Gi_CNO, p < 0.001; Gq_Saline vs Gq_CNO, p = 0.380; mCherry_Saline vs mCherry_CNO, p = 0.052
F	Kruskal-Wallis		H = 4.465, p = 0.215
G	Kruskal-Wallis		H = 15.198, p = 0.002, CNO_Partner vs CNO_Stranger, p < 0.0001; saline_Partner vs saline_Stranger, p = 0.328
H	Two-Way Repeated Measures ANOVA with Sidak's multiple comparison test		group × treatment: F (1, 11) = 2.039, p = 0.181; group: F (1, 11) = 0.135, p = 0.720; treatment: F (1, 11) = 2.293, p = 0.158; CNO_Partner vs CNO_Stranger, p = 0.998; saline_Partner vs saline_Stranger, p = 0.136
I	Two-way ANOVA with Sidak's multiple comparison test		group × treatment: F (2, 40) = 3.798, p = 0.031; group: F (2, 40) = 6.797, p = 0.003; treatment: F (1, 40) = 3.375, p = 0.074; Gi_Saline vs Gi_CNO, p = 0.861; Gq_Saline vs Gq_CNO, p = 0.002; mCherry_Saline vs mCherry_CNO, p = 0.805
J	Kruskal-Wallis		H = 8.083, p = 0.044; CNO_Partner vs CNO_Stranger, p = 0.384; saline_Partner vs saline_Stranger, p = 0.033
K	Two-Way Repeated Measures ANOVA with Sidak's multiple comparison test		group × treatment: F (1, 15) = 0.002, p = 0.968; group: F (1, 15) = 0.447, p = 0.514; treatment: F (1, 15) = 21.427, p = 0.0003; CNO_Partner vs CNO_Stranger, p = 0.009; saline_Partner vs saline_Stranger, p = 0.012
L	Two-Way Repeated Measures ANOVA with Sidak's multiple comparison test		group × treatment: F (1, 11) = 0.043, p = 0.839; group: F (1, 11) = 0.306, p = 0.591; treatment: F (1, 11) = 25.166, p = 0.0004; CNO_Partner vs CNO_Stranger, p = 0.009; saline_Partner vs saline_Stranger, p = 0.009
