# Supplementary material for: Different roles of D1/D2 medium spiny neurons in the nucleus accumbens in pair bond formation of male mandarin voles
Source: eLife. 2025 Jun 6;13:RP100292. doi: 10.7554/eLife.100292 (PMC12143883; doi:10.7554/eLife.100292)
Supplement: Figure 7—figure supplement 1—source data 1. [file elife-100292-fig7-figsupp1-data1.xlsx]

## Sheet: Sheet1
Figure7 S1B	Gq (n = 3)	hM3Dq-mCherry+D1R+/hM3Dq-mCherry+(%)
		93.4783	83.3333	90.9091
Figure7 S1D	Gi (n = 3)	hM4Di-mCherry+D1R+/hM4Di-mCherry+(%)
		87.5	88.2353	93.75
Figure7 S1F	mCherry (n = 3)	D1-mCherry+D1R+/D1-mCherry+(%)
		83.3333	86.3636	96.4286
