# Supplementary material for: Different roles of D1/D2 medium spiny neurons in the nucleus accumbens in pair bond formation of male mandarin voles
Source: eLife. 2025 Jun 6;13:RP100292. doi: 10.7554/eLife.100292 (PMC12143883; doi:10.7554/eLife.100292)
Supplement: Figure 7—figure supplement 2—source data 1. [file elife-100292-fig7-figsupp2-data1.xlsx]

## Sheet: Sheet1
Figure7 S2B	D1-mCherry (n =3)	D1-mCherry+D2R-mRNA+/D1-mCherry+(%)
		19.5122	17.0732	28.9474
Figure7 S2C	D1-mCherry(n = 3)	D1-mCherry+D2R-mRNA+/D1R-mRNA+(%)
		27.3585	30.0971	27.1186
