# Supplementary material for: Different roles of D1/D2 medium spiny neurons in the nucleus accumbens in pair bond formation of male mandarin voles
Source: eLife. 2025 Jun 6;13:RP100292. doi: 10.7554/eLife.100292 (PMC12143883; doi:10.7554/eLife.100292)
Supplement: Figure 7—source data 1. [file elife-100292-fig7-data1.xlsx]

## Sheet: Sheet1
Figure 7E	indicator Group	Social preference ratio
		CNO								saline
	Gq	0.032587	0.537153	-0.22547	0.297307	-0.21245	-0.31976	0.821932	0.208523	-0.67326	0.772595	0.740729	-0.45556	-0.65823	-0.75071	0.809643
	Gi	-0.44884	-0.26657	0.802028	0.924667	-0.23005	0.106595	0.989066		0.17101	0.432349	-0.28281	-0.32337	-0.04738	0.114936
	mCherry	-0.86803	-0.79365	0.897084	0.318378	0.494281	-0.33318	-0.44428	-0.07567	-0.47452	-0.89127	-0.57952	-0.83014	-0.55703	-0.55371	0.289254
Figure 7F	indicator Gq Group	Time (s)
	CNO-partner (n = 8)	1873.5	1711.19	2044.25	2632.56	2424.56	1832.75	455.31	620.8
	CNO-stranger (n = 8)	1755.25	515.25	3234.44	1425.94	3732.69	3555.75	44.5	406.57
	saline-partner (n = 7)	1140.19	5259.12	3037.25	1756.19	572.25	384.56	5056.18
	saline-stranger (n = 7)	5839.06	674.69	452.38	4695.19	2776.5	2700.69	531.86
Figure 7G	indicator Gi Group	Time (s)
	CNO-partner (n = 7)	1185.69	1311.5	2235.19	7463.56	2095.25	1598.26	4880.6
	CNO-stranger (n = 7)	3116.81	2264.87	245.56	292.13	3347.31	1290.35	26.83
	saline-partner (n = 6)	899.81	680.81	667.19	291.69	363.13	324.53
	saline-stranger (n = 6)	637	269.81	1193.37	570.5	399.25	257.62
Figure 7H	indicator mCherry Group	Time (s)
	CNO-partner (n = 8)	516.56	841.94	6008.13	4661.37	1058.19	552.94	1727.56	2078.5
	CNO-stranger (n = 8)	7311.94	7318.19	325.94	2410	358.13	1105.5	4489.81	2418.81
	saline-partner (n = 7)	1381.81	444.6	496	773.31	369.3	1785	1451.5
	saline-stranger (n = 7)	3877.43	7733.8	1863.2	8331.78	1298.1	6214.3	800.19
Figure 7I	indicator Group	Social preference ratio
		CNO								saline
	Gq	0.795957	0.705971	-0.24641	-0.41578	-0.88824	-0.44697	-0.92466	-0.12429	0.853883	0.929717	0.208874	0.72011	0.789655	0.288165	0.809296
	Gi	-0.20383	0.437784	0.216705	0.680341	-0.19643	0.039818	-0.01007		0.328506	0.428131	0.321857	0.93414	0.743179	0.443638
	mCherry	0.090759	0.224302	0.809643	0.328741	0.336198	0.855049	0.530346	0.937239	0.487993	0.944881	-0.62529	0.958592	0.085247	0.578389	0.153299
Figure 7J	indicator Gq Group	Time (s)
	CNO-partner (n = 8)	7135.65	6666.56	1041.75	1154.05	465.12	1917.5	291.87	1729.88
	CNO-stranger (n = 8)	810.7	1149	1723	2796.7	7858.38	5017	7455.87	2220.94
	saline-partner (n = 7)	6730.81	7610.62	2828.5	2610.37	3002.88	2736.63	6091.69
	saline-stranger (n = 7)	530.5	277.19	1851.06	424.75	352.94	1512.25	642.08
Figure 7K	indicator Gi Group	Time (s)
	CNO-partner (n = 7)	1272.06	2608.5	1654.19	6019.19	1347.56	1828	3656.94
	CNO-stranger (n = 7)	1923.37	1020	1064.94	1145.06	2006.38	1688	3731.31
	saline-partner (n = 6)	3479.81	4611.12	1146.87	8399.12	6768.44	4076.56
	saline-stranger (n = 6)	1758.87	1846.44	588.37	286	997.19	1571.06
Figure 7L	indicator mCherry Group	Time (s)
	CNO-partner (n = 8)	2761.9	4576.25	5056.18	3997.06	3204.87	9695.99	2858.15	5961.31
	CNO-stranger (n = 8)	2302.28	2899.44	531.86	2019.25	1592.13	757.63	877.15	193.13
	saline-partner (n = 7)	4827.45	8917.23	375.75	9554.17	3337.59	5938.35	3889.53
	saline-stranger (n = 7)	1661.09	252.72	1629.81	201.99	2813.25	1586.22	2855.52
Figure 7	test type		Exact P-value, F-value with degree of freedom for ANOVAs, t-value with degree of freedom for t-tests
E	Two-way ANOVA with Sidak's multiple comparison test		group × treatment: F (2, 37) = 0.186, p = 0.831; group: F (2, 37) = 2.729, p = 0.078; treatment: F (1, 37) = 2.839, p = 0.100
F	Kruskal-Wallis		H = 0.743, p = 0.863
G	Kruskal-Wallis		H = 9.597, p = 0.022; CNO_Partner vs CNO_Stranger, p = 0.087; saline_Partner vs saline_Stranger, p = 0.821
H	Two-Way Repeated Measures ANOVA with Sidak's multiple comparison test		group × treatment: F (1, 13) = 1.388, p = 0.260; group: F (1, 13) = 0.008, p = 0.928; treatment: F (1, 13) = 5.001, p = 0.044; CNO_Partner vs CNO_Stranger, p = 0.700; saline_Partner vs saline_Stranger, p = 0.071
I	Two-way ANOVA with Sidak's multiple comparison test		group × treatment: F (2, 37) = 4.934, p = 0.013; group: F (2, 37) = 0.873, p = 0.426; treatment: F (1, 37) = 7.633, p = 0.009; Gq_Saline vs Gq_CNO, p = 0.001; Gi_Saline vs Gi_CNO, p = 0.109; mCherry_Saline vs mCherry_CNO, p = 0.522
J	Kruskal-Wallis		H = 12.819, p = 0.005; CNO_Partner vs CNO_Stranger, p = 0.256; saline_Partner vs saline_Stranger, p = 0.001
K	Two-Way Repeated Measures ANOVA with Sidak's multiple comparison test		group × treatment: F (1, 11) = 4.281, p = 0.063; group: F (1, 11) = 1.513, p = 0.244; treatment: F (1, 11) = 11.027, p = 0.007; CNO_Partner vs CNO_Stranger, p = 0.377; saline_Partner vs saline_Stranger, p = 0.004
L	Two-Way Repeated Measures ANOVA with Sidak's multiple comparison test		group × treatment: F (1, 13) = 0.033, p = 0.859; group: F (1, 13) = 0.325, p = 0.578; treatment: F (1, 13) = 15.559, p = 0.002; CNO_Partner vs CNO_Stranger, p = 0.033; saline_Partner vs saline_Stranger, p = 0.029
